# Supplementary material for: Molecular dynamics simulations of the lithium coordination environment in phosphate glasses
Source: Royal Society of Chemistry journal article supplement (doi:10.1039/b004627m), 2000-01-01
Supplement: supp.doc [file supp.doc]

** **

**Supplemental Material**

**Molecular Dynamics Simulations of the Lithium Coordination Environment in Phosphate Glasses**

**Todd M. Alama, Jian-Jie Liangb and Randall T. Cyganb**

*a Organic Materials Department, Sandia National Laboratories, MS-1407, Albuquerque, NM, 87185-1407, USA E-mail:tmalam@sandia.gov*

*b Geochemistry Department, Sandia National Laboratories, MS-0750, Albuquerque, NM, 87185-0750, USA*

**Table 1S:** Number of atoms and cell dimensions of the

Li-ultraphosphate glasses, *x* Li2O  (1-*x*) P2O5.

|  | | |
| --- | --- | --- |
| *x* | Number of atoms | Simulation cell dimensions (Å) |
| 0.0 | 336 | 16.8 x 16.8 x 12.6 |
| 0.1 | 396 | 23.3 x 15.6 x 15.6 |
| 0.2 | 372 | 22.9 x 15.4 x 15.4 |
| 0.3 | 348 | 22.7 x 15.2 x 15.2 |
| 0.4 | 324 | 22.3 x 14.9 x 14.9 |
| 0.5 | 360 | 21.4 x 16.0 x 16.0 |

**Fig. 1S:** A comparison of the experimental G(r) for a lithium metaphosphate glass (*x* = 0.5) obtained from neutron diffraction46 (solid line), X-ray diffraction47 (upper offset solid line) and the MD simulation G(r) (dashed line). It should be noted that natural lithium has a negative neutron scattering length, such that the pair distribution correlations between Li-O and Li-P produce a negative peak in the G(r) [ See Eqn. 1 of Ref. 46]. These negative peaks have been included in the MD simulated G(r) for direct comparison to the neutron diffraction results.

**Fig. 2S**: Pair distribution function for the Li-O atomic pair for the *x*Li2O·(1-*x*)P2O5 glass at 300 K from MD simulations as a function of Li2O concentration.

**Fig. 3S:** Pair distribution function for the Li-P atomic pair for the *x*Li2O·(1-*x*)P2O5 glass at 300 K from MD simulations as a function of Li2O concentration.

**Fig. 4S:** Pair distribution function for the Li-Li atomic pair for the *x*Li2O·(1-*x*)P2O5 glass at 300 K from MD simulations as a function of Li2O concentration.
